# Supplementary material for: Factors that facilitate consumer uptake of sustainable dietary patterns in Western countries: a scoping review
Source: Frontiers journal article supplement (doi:10.3389/fsufs.2024.1333742), 2024-04-23
Supplement: Table_1.XLSX [file Table_1.XLSX]

## Sheet: Sheet1
Study name	DOI	Author & Year		Country	Design	Aim of Study	No. participants	Recruitment Methods	Participant Breakdown (Age/Gender)	COIs	Method of Data Collection/Analysis	Results of Interest	Outcome of Interest
A qualitative exploration of the factors underlying seniors' receptiveness to entomophagy	http://dx.doi.org/10.1016/j.foodres.2017.10.032	Gael Myers and Simone Pettigrew, 2017	2017	Australia	Qualitative	To explore the factors associated with older people's attitudes towards entomophagy and identify strategies to encourage seniors to adopt the practice.	77	Initially, eight seniors were recruited via advertisements on community radio, flyers, and community newspaper advertisements to become data collectors and conduct the interviews. The data collectors were encouraged to invite word-of-mouth contacts, acquaintances, and friends to be interviewed for the study. The only restriction for inclusion in the study was being aged 60 + years.	Western Australian seniors aged 60 years and over. (average age of the interviewees was 73 years and most were female (n = 67))	Low generalisability: -The study was conducted with community-dwelling older adults who resided in one geographical location (Western Australia) and were in relatively good health. As such, the results may not reflect the views of older adults living in other locations, those residing in care facilities, or younger age groups. -interviewees were mostly female, therefore results may not adequately…	Qualitative Survey: Interviews were conducted within interviewees' homes to create a comfortable setting that encouraged individuals to answer questions openly and honestly. The average duration of the interviews was 33 min (range 12–74 min).	-Around two-thirds of the interviewees indicated that entomophagy was not an eating practice they were willing to consider. Most of the remaining interviewees were receptive to the idea of consuming insects, and just a few reported being unsure. -Three themes emerged in the interviewees' discussions about their views of entomophagy: cultural norms, necessity versus enjoyment, and knowledge about …	Overall, the interviewees exhibited a low level of awareness of the environmental and nutritional benefits of entomophagy, suggesting that it may be useful for initiatives that promote insect consumption to incorporate an educational component. In addition, it is likely that strategies that emphasise the potential enjoyment associated with insect consumption (e.g., novelty, crunchiness, exotic fl…
Healthy and environmentally sustainable food choices: Consumer responses to point-of-purchase actions	https://doi.org/10.1016/j.foodqual.2016.12.008	Hoek, A.C.; Pearson, D.; James, S.W. ; Lawrence, M.A.; Friel, S. (2017)	2017	Australia	Cross-sectional	To determine the effects of point of purchase actions on the likelihood of consumers to increasingly choose more sustainably food products (in terms of health and environment).	944	Participants recruited in 2014 via online panel provider (Research Now). This software has a certificate of ISO20252 for quality in market and social research. Quota sampling was used to get accurate representation of Australian grocery buyers in households. Demographic matching was done with a previous Australian survey. Participant inclusion criteria was that they had to have primary or shared …	Total Sample: 65 % Female; 35% Male Median age: 40 Majority of participants were 25 - 54 (69%) Participants were mostly (37%) at a medium education level.	N/A	Online choice experiment survey. Attribute scores were standardized and characteristics of consumers were compared through within and between sample t-tests. Friedman and Wilcoxon tests were used for within samples while Kruskall-Wallis and Mann Whitney U test was used between samples. Bonferroni corrections were applied as post-hoc tests. Categorical variables were compared through Chi-square te…	1. Rice experiment: this examined the different point-of purchase actions for white rice vs brown rice. Overall, choice was influenced most by the price of brown rice, and white rice was chosen 61% of the time. Once the price of brown rice was reduced to be less than white rice, 57% chose it. A combination of health and environment labels on the package had a more positive effect than just one of…	Overall price was a greater influencer on shifting choices than was a health/envrionment logo. When the alternative product is more similar to the standard, it is more likely to be chosen (i.e. white vs brown rice as opposed to beef vs kangaroo meat). Point-of-purchase actions can contribute to facilitate the uptake of more sustainable foods, especially when the sustainable options are similar to…
Australians’ experience, barriers and willingness towards consuming edible insects as an emerging protein source	https://doi.org/10.1016/j.appet.2021.105832	Indee Hopkinds, Asgar Farahnaky, Harsharn Gill Lisa. P. Newman, Jessica Danaher, 2021	2021	Australia	Cross Sectional	To explore Australian consumers’ experiences with edible insects, identify barriers to consumption, and explore possible factors that may motivate Australians to consume insects	601	Survey recruitment was via social media platforms Facebook and Twitter, in the form of promotion on the researchers’ accounts and manually posting study information in various community groups and pages. Word of mouth recruitment was encouraged with survey participants asked to share the survey link within their networks.	23.8% male, 76.2% female	Sample is not representative of the Australian population - majority of participants were highly educated females which have been associated with increased food variety and may have unintentionally inflated the overall willingness of participants in this study to eat insects.	Qualitative/Quantitative Survey: Online survey using a variety of open-ended questions; 5- or 7-point Likert scales and check-all-that-apply questions	-Participants with no previous experience consuming insects cited ‘lack of opportunity’ as the main reason (57.2%). -‘Increased accessibility’ (56.6%) and ‘increased nutrition knowledge’ (56.6%) were identified as major factors that may increase the likelihood of future insect consumption. -Participants reporting that they were willing to try insects were most likely to accept ‘insect-based flour…	The findings of this study indicate that most Australians are open to the possibility of future insect consumption. While some participants reported disgust or safety concerns as a barrier to insect consumption, the majority reported a lack of opportunity as the main barrier for not having eaten insects before. Therefore, it is feasible to maintain optimism for future changes to Australians’ will…
Flemish consumer attitudes towards more sustainable food choices	https://doi.org/10.1016/j.appet.2012.11.003	Filiep Vanhonacker, Ellen J. Van Loo, Xavier Gellynck, Wim Verbeke (2013)	2013	Belgium	Cross-sectional	This study aims to explore consumer opinions to food choices that have a low ecological impact. This will help to shift to more sustainable diets so that ecological pressure on the planet can be reduced.	221	Convenience sampling was used.	Majority of participants: female, aged 18-30, high education, have the main responsibility for groceries in the household, above average financial status	N/A	Online survey was used. Data analysis was done using SPSS 19.0. Deserciptive statistics were applied. Construct reliability using Cronbach's alpha, bivariate analysis using correlation and independent samples t-test, ANOVA F-tests, as well as cross tabulations for categorical variables was used. Ward's method was used for cluster analysis.	68.6 % of particpants claimed to be aware of the concept of ecological footprint; however they underestimated the environmental impact of animal production and meat consumption. 63.3 % of the participants were concerned about increasing CO2 emissions, climat changes, and ecological footprint. Reducing meat consumption was chosen most by the participants as a way to faciliate a more sustainable di…	Common sustainable alternatives such as reduced meat consumption, and low impact meat consumption, as well as sustainable fish are see seen as acceptable methods to adopt. Consumers are clearly less willing to pay than they are willing to consume. 5 consumer archetypes were devloped based on the self-evaluation portion of the survey: Conscious, Active, Unwilling, Ignorant, and Uncertain. Each typ…
Drivers and inhibitors in the acceptance of meat alternatives: the case of plant and insect-based proteins.	https://doi.org/10.3390%2Ffoods9091292	de Koning et al., 2020	2020	China, USA, France, UK, New Zealand, Netherlands, Brazil, Spain, and the Dominican Republic	Cross-sectional	The overarching aim of this study was to evaluate whether plant- and insect-based proteins could be realistic meat alternatives from the consumers’ point of view.	3091	The various collaborators and co-authors were responsible for distributing the survey at a country level (mainly through social media and existing e-mail contact lists).	The gender distribution was 59.2% females, 38.9% males, and 1.9% who preferred not to answer.	n/a	Quantitative survey	Customers are more willing to try novel foods when they contain familiar ingredients, although they are unlikely to pay more for novel products—for example, organic meat, moderation of meat consumption, and sustainable fish are accepted, although willingness to pay more is lower than willingness to consume. The readiness by consumers to adopt insects as an alternative meat ingredient where tradit…
From beef to beans: Eating motives and the replacement of animal proteins with plant proteins among Finnish consumers	https://doi.org/10.1016/j.appet.2016.03.002	Vainio et al., 2016	2016	Finland	Quantitative / qualitative (likert, but could comment on choice)	To examine how eating motives were associated with self-reported changes in the consumption of beef, beans, and soy products, i.e., changes related to reducing animal and increasing plant proteins.	1048	Collected through an online questionnaire with one reminder, directed to the members of a consumer panel by a commercial marketing research company, representative of 15–63-year-old Internet users living in Finland.	Age 15–24 years (19%) Age 25–44 years (38%) Age 45–64 years (43%) 42% Male & 58% Female	N/A	Measuring eating motives with the TEMS scale, used self-reporting for past and future diet consumption, and socio-demographic variableschanges in the consumption of beef, beans, and soy products.	25.4% consumed beef, 23.2% consumed beef and beans, 23% consumed beef, beans and soy products, 8.9% tried to change their meat intake in the past, and 7.5% did not eat beef but beans and soy products. The consumption patterns of these groups explain they will stay the same into the future. 2.2% are actively trying to eat more plant protein, thus they are aiming to change into the future. The grou…
Consumer willingness to pay for plant-based foods produced using microbial applications to replace synthetic chemical inputs.	https://doi.org/10.1371%2Fjournal.pone.0260488	Ali et al., 2021	2021	Italy, Germany, Netherlands, Finland and other countries	Cross-sectional	The objective of this study was to elicit consumers’ WTP for foods that are produced with microbial applications during the plant production phase with the aim to reduce the use of synthetic chemicals in crop farming, as well as to understand the associations of food choice motives, personal and socio-demographic factors with the WTP.	291	The questionnaires were distributed online using the Qualtrics software through social media platforms, and via the involved partner institutions in the respective countries (Wageningen University, University of Parma, Natural Resources Institute Finland, and Italian National Agency for New Technologies, Energy and Sustainable Economic Development).	Of the total 291 respondents, the majority are female, highly educated, young, urban residents	n/a	Quantitative survey	The results of the structural model show that older people, organic food consumers, those who purchase elsewhere than from supermarkets, and consumers who are concerned about the impact of synthetic chemical use in agriculture on the environment and their health are more promotion-oriented. Consumers who spend relatively more of their income on food, frequent consumers of the product under consid…
You Are What You Eat: The Relationship between Values and Organic Food Consumption	https://doi.org/10.3390/su12093900	Vega-Zamora, M.; Parras-Rosa, M.; Torres-Ruiz, F.J. (2020)	2020	Spain	Cross-sectional	aim is to: (1) analyse whether the configuration of the values of non-consumers of organic foods is different from that of consumers and (2) examine whether within the latter group (organic food consumers), the number of products consumed or the intensity (frequency) of consumption reflects different configurations of values.	776	The interviewers selected the sample population in the street (on a 1:3 ratio basis, using a random number table) and the interview lasted about 20 min, as there were also other consumer behaviour questions in the survey that fell outside the research objectives of this paper. Six geographically dispersed cities in Spain were selected (Madrid, Barcelona, Seville, Salamanca, Oviedo and Valencia).	The study population was defined as a group of consumers responsible for food shopping, aged 25 to 65, with quotas for education level (50% of the sample were university-educated), sex (60% were women) and age (50% were aged 35 or under)	The authors declare no conflict of interest	The instrument used to collect the data required to fulfil the research objectives was a structured questionnaire conducted through face-to-face interviews using a PDA. The interviewees’ food values were measured by a 5-category scale on which they rated the level of importance they attribute to each item. Each item collects an opinion, perception or manifestation regarding a specific food-relate…	Firstly, the quantity of organic foods consumed is more related to the consumers’ involvement with food in general or the role it plays in their lives. Secondly, environmental awareness is not particularly important, given that it is not related to the quantity of foods consumed in this group. Results are consistent with previous studies. Thus, in general terms, the relationship between specific …
Barriers and facilitators to successful implementation of sustainable school meals: A qualitative study of the OPTIMAT-intervention.	https://doi.org/10.1186%2Fs12966-021-01158-z	Eustachio Colombo et al., 2021	2021	Sweden	Qualitative	The aim of this study was to explore pupils’ and kitchen staff’s experiences with the introduction of a nutritionally adequate and climate-friendly 4-week school lunch menu and to identify barriers and facilitators to successful implementation of sustainable school meals.	42	Eight pupils in grade 5 and eight pupils in grade 8 in each of the three schools, (24 pupils per grade, 48 in total), were invited to participate in the FGDs through an invitation letter directed to both the pupil and legal guardian(s). School teachers in grades 5 and 8 disseminated these letters to pupils during class and instructed them to hand them over to their parents/legal guardians, obtain…	Nine focus group discussions (FGDs) were conducted, six with pupils in grades 5 (ages 10–11) and 8 (ages 14–15) (n = 29) and three with kitchen staff (n = 13).	n/a	Focus groups, intervention	The kitchen staff acknowledged the importance of considering sustainability in their day-to-day practice (before the intervention) and thus tried to contribute to environmental sustainability when ordering food, e.g., exploring ways to make substitutions that are better from a climate perspective. The economic aspect was nevertheless perceived as a limitation in making decisions (before the inter…
Comparison of food recommendations varying in sustainability: Impact on dietary intake and motivation to follow recommendations (2020)	https://doi.org/10.1177/1359105317718056	Martijn Veltkamp, Doeschka J Anschutz, Stef PJ Kremers, and Rob W Holland (2017)	2017	The Netherlands	RCT	In this article, consumers’ compliance with a diet comparable to current food recommendation (relatively small deviation from current eating behavior) versus a nutritionally equivalent but more sustainable plant-based diet (larger deviation from current behavior) is therefore compared.	340	Participants were recruited online via research panel of the Dutch market research agency Direct Research, consisting of >70,000 Dutch inhabitants. People currently following specific diets could not participate. In the invitation to participate, it was mentioned that participation included trying to change food intake behaviors during a period of 3 weeks. It was made explicitly clear that the st…	221 female, 119 male between 25- and 50-years old	The author(s) declared the following potential conflicts of interest with respect to the research, authorship, and/or publication of this article: The first author is employed within the food industry, which could be perceived a potential conflict of interest. All other authors have no conflicts of interests to declare.	Two food recommendations were created with similar nutritional quality, while significantly differing in sustainability. One was standard and one was sustainable. Both before and following the intervention, questionnaires were provided to participants.	- There was no change in intake in the standard diet condition (Mpre = .32; Mpost = .30), intake did change in the sustainable diet condition (Mpre = .54; Mpost = .47); in that, participants reported to behave more in line with recommendations. However, a between-subject main effect for condition was observed, F(1,337) = 330.63, p < .01, η2 = .50, indicating that participants receiving the standa…	The observation that food recommendations with a greater distance to consumers’ current eating behavior are less complied with and result in a lower motivation to continue trying to follow such recommendations is in line with research on self-control.
Consumer valuation of carbon labeled protein-enriched burgers in European older adults.	https://doi.org/10.1016/j.foodqual.2020.104114	Broeckhoven et al., 2021	2021	The Netherlands, UK, Poland, Finland and Spain	Cross-sectional (Methods: Quantitative, questionnaire)	To share sustainable methods of increasing protein intake in European adults aged 65 years or older. The aging population and protein malnutrition being of concern.	2500 (500 from each country)	Probabilistic sampling was used through a proprietary online panel of a professional marketing research company. If respondents were 65 years old or above and living independently at home, they were considered. Then, each of the five EU countries, respondents were screened according to quotas proportional to population distributions.	65 years or older, male (52.3%), 62.4% have completed the secondary level or below,	N/A	Categorical variables were analyzed using a chi-square association test, while non-categorical variables were analyzed using an independent-samples Kruskal-Wallis test using SPSS v26.	An average of 1/3 of their plate was filled with meat and they ate processed meat 1-2 times in a week. 80% will keep eating red meat, 76% will keep eating processed meat, and 88% will continue eating poultry to promote their health. Only 19.2% want to eat less red meat and 23.35 want to decrease their processed meat consumption. 1/4 never eat meat substitute, while 10.9% want to eat more substitu…
A cross-sectional survey of the readiness of consumers to adopt an environmentally sustainable diet	https://doi.org/10.1186/s12937-020-00644-7	Amy Culliford and Jane Bradbury	2020	United Kingdom	Cross-sectional	Expand on international research on sustainable dietary guidelines	442	A self-recruit sampling method was utilized whereby a link to the online survey was shared via company e-newsletters and employees were invited to participate and to share the link with friends and family	66% female, 80% aged 25–54 years, 85% with higher education	-Self-recruit sampling method which has the limitation that those with an interest in the topic may be more inclined to take part. -Recruited participants primarily from the Environment Agency employees who may be more aware of sustainability issues than the general public due to the nature of their employment. -Sample included a higher proportion of females and university educated individuals wh…	Cross sectional online survey	-More participants considered ‘reduce consumption of air-freighted foods’ (79%), ‘reduce food waste’ (75%), and ‘buy locally grown produce’ (78%) to have a high environmental benefit. -Smaller proportion of participants perceived ‘prioritise plant-based proteins’ (42%) and ‘choose organic produce’ (27%) to have a high environmental benefit. -Women more likely than men to be in the action/maintanc…	Overall, participants were aware of the environmental benefit associated with adopting various sustainable dietary recommendations, although they may not fully understand which behaviours offer the largest environmental benefit. Dietary guidelines and campaigns promoting sustainable diets should focus on raising awareness of the environmental benefit of prioritising plant-based proteins and choos…
Consumer Knowledge and Acceptance of “Algae” as a Protein Alternative: A UK-Based Qualitative Study	https://doi.org/10.3390/foods11121703	Mellor C, Embling R, Neilson L, Randall T, Wakeham C, Lee MD, Wilkinson LL (2022)	2022	United Kingdom	Qualitative Study Design	This study aimed to develop a rich and contextualised understanding of consumer beliefs about algae as a “novel” alternative to animal-based proteins	34	Participants were recruited from Swansea University and surrounding areas, as well as via online platforms (e.g., social media). Eligibility criteria for the study stated that participants must be aged 18+ years, be currently living in the UK, have normal or corrected to normal vision, have no current or pre-existing diagnosis of eating disorders, and have no known food allergies or intolerances.	Participants were aged between 19 and 66 years old (M = 34.06; SD = 83.27), and included 22 females and 12 males.	Louise Neilson’s time was offered as an in kind contribution to the grant that supported this study. Chloe Mellor was a Swansea University student when the study was conducted but an employee of BIC Innovation at the time of article submission—this had no influence on the content of the study. BIC Innovation placed no restrictions on the design, implementation, analysis or interpretation of the d…	Focus groups on ZOOM. Within these discussions, participants were asked a series of questions about “algae” and “algae-based food products” following a semi-structured interview guide.	*In the context of discussing edible uses for algae, participants described being willing to try and consume algae if products were appetising, healthy, sustainable, and low cost. -willingness to try algae was most often related to the novelty of consumption. -Most participants initially viewed this as a positive feature of the food source, believing that it would create a nuanced experience for …	Overall, participants were found to have a limited pre-existing knowledge of algae as a food source. Though participants were generally open to the idea of trying a range of potential algae-based food products, acceptance of algae was influenced by several product attributes, including perceived novelty, edibility, healthiness, sustainability, and affordability. The findings suggest that algae re…
Sustainability labels on food products: Consumer motivation, understanding and use	https://doi.org/10.1016/j.foodpol.2013.12.001	Klaus G. Grunert, Sophie Hieke, Josephine Wills, 2013	2013	United Kingdom, France, Germany, Spain, Sweden, and Poland	Cross-sectional	Making sustainability labels available on food products opens up new ways of making choices for consumes, and we are interested in whether consumer are motivated to use these, whether they understand them, and how motivation and understanding together impact on use of these labels.	4408	The online survey was distributed to the Ipsos Mori panel database in the six countries. Quotas were set for age, gender and educational attainment.	Ages 18+. average 50% female, 50% male	N/A (not mentioned)	Four sustainability labels were chosen as examples for measuring understanding and use. Two labels deal with the environmental dimension of sustainability (Rainforest Alliance, Carbon Footprint) and the two others with the ethical dimension (Fair Trade, Animal Welfare) Six product categories were selected to investigate product-specific motivation to process sustainability information and for mea…	The results indicated a low level of use, no matter whether use was measured as self-reported use or as use inferred from the results of a choice-based conjoint analysis where sustainability information was put into the context of price and nutritional information. Use is related to motivation – the more consumers are concerned about sustainability issues with regard to food production, the highe…
Healthy, sustainable and plant-based eating: Perceived (mis)match and involvement-based consumer segments as targets for future policy	https://doi.org/10.1016/j.foodpol.2017.03.001	Ellen J. Van Loo, Christine Hoefkens, Wim Verbeke, (2017)	2017	United Kingdom, Germany, Belgium, and the Netherlands	Cross-sectional	This study investigates consumer perceptions of the match, or mismatch, between healthy and sustainable diets, and gives insight into consumers’ motivation to eat healthily and sustainably, as measured by involvement.	2783	Participants were recruited by a subcontracted professional market research agency that abides by the ICC/ESOMAR International Code on Market and Social Research. Samples were representative of the national populations in terms of gender, age and region in each country.	Ages 18-65, 50/50% male and female	N/A (not mentioned)	Online Quantitative survey. Items include: Meaning of sustainability, Perceptions of healthy, sustainable and plant-based diets, Involvement in healthy and sustainable eating, Self-reported healthy and sustainable eating, Subjective healthiness and sustainability of the diet, Food-related health and sustainability concerns, Consumption of plant-based foods and attitudes towards plant-based diets,…	Meaning of sustainability - items relating to deforestation, the environmental impact of human use of land and water, and recyclable packaging scored the highest Consumers’ perceptions of sustainable, healthy and plant-based diets - each of the three concepts was most strongly associated with the attributes ‘nutritious’ and ‘natural’, Both a healthy and a sustainable diet were associated with pla…	In all results presented, sustainability primarily referred to environmental sustainability. The evaluation of (dis)similarities between ‘a healthy diet’, ‘a sustainable diet’ and ‘a plant-based diet’ as perceived by consumers in this study illustrates the highly compatible and favorable image of these three concepts. The findings suggest a close match between consumer perceptions of health, sust…
Older consumers’ readiness to accept alternative, more sustainable protein sources in the European Union.	https://doi.org/10.3390/nu11081904	Grasso et al., 2019	2019	United Kingdom, the Netherlands, Poland, Spain & Finland	Cross-sectional quantitative survey	Investigate readiness of older consumers to accept alternative, more sustainable protein sources (plants, insects, single-celled proteins & in vitro meat) & assess factors underlying acceptance.	1825	A professional market research agency used probabilistic sampling from an online access propriety panel. Gender and region quotas were used to ensure a nationally representative sample of each country involved.	Gender: 50.4% male, 49.6% female. Age: 55.9% between 65-69 years, 44.1% between 70-90 years.	The authors declare no conflicts of interest.	Quantitative survey	Plant-based protein sources are the most acceptable alternative protein for older adults. Older adults' acceptability of alternative protein is influenced by food fussiness, green eating behaviour, educational attainment, different food motives, gender and country of residence. To increase acceptance for this demographic, campaigns should focus on increasing awareness and familiarity with alterna…
Understanding meat consumption in later life: a segmentation of older consumers in the EU.	https://doi.org/10.1016/j.foodqual.2021.104242	Grasso et al., 2021	2021	United Kingdom, the Netherlands, Poland, Spain & Finland	Cross-sectional	Analyze meat consumption decision-making and behavior in community dwelling older adults in the EU by conducting a segmentation analysis. Understand how to prevent protein malnutrition in older adults.	2478 (or approx 2500)	Respondents 65 years and above were recruited by a professional market research agency using probabilistic sampling from an online access propriety panel. Sampling quotas were used to ensure gender and regional differences were proportional to the national population.	52.2% male and 85.4% between 65-74 years old.	The authors declare that they have no known competing financial interests or personal relationships that could have appeared to influence the work reported in this paper.	Food frequency questionnaire; SNAQ for appetite; quantitative survey to assess linking of different protein sources and food motives	Small difference observed in meat consumption between genders, suggesting that other factors may overpower cultural norms in older adults (e.g., changing appetite, reduced acces to food d/t mobility issues), or that gender norms are altered in later life. Meat consumption was also found to be related to country, in regard to cultural foods and financial status of the country. Consumption is also …
Community supported agriculture membership in Arizona. An exploratory study of food and sustainability behaviours	http://dx.doi.org/10.1016/j.appet.2012.06.002	MacMillan Uribe et al., 2012	2012	United States	Cross-sectional (Methods: Survey, quantitative and qualitative)	To examine whether ecological attitudes of CSA members could predict food- and sustainability-related behaviours.	115	Participants were recuited by being a part of Community Supported Agriculture (CSA) programs in Arizona. Members were added to a list. Then, coordinators for CSA were sent emails with a summary of the research and proposal to share the survey with members that were over 18 years old.	18 years or older. (average of 42 years), mostly female, and non-Hispanic white,	N/A	Ordinary least squares (OLS) multivariate regression analysis	By joining CSA, 67.5% of members self-reported they ate more fruits and vegetables and 92.1% had consumed a larger variety of fruits and vegetables. This also impacted families, where 62% ate more fruits and vegetables and 88.9% increased the variety of fruits and vegetables. Respondents generally ate out and spent $44, 3 times a week. One's income and their education level impacted how much mone…
Comparing importance and confidence for production and source attributes of seafood among residents and tourists in South Carolina and Florida coastal communities	https://doi.org/10.1016/j.appet.2019.104510	Jodice & Norman, 2019	2019	United States	Cross-sectional (Methods: Survey, quantitative)	To find the level of importance and confidence for production and source attributes when purchasing seafood (based on tourists and residents in six American coastal communities within Florida and South Carolina).	575 (413 from South Carolina and 162 from Florida)	Survey instrument were administered online via email invitation. Tourists were intercepted (at beaches, parks, developed waterfronts, downtown areas, and community events) and email addresses were collected in the South Carolina communities during the summer; while during fall, winter and spring in Florida. Randomized sampling procedure was based on every third person crossing an imaginary line. …	SC Tourist (N = 199; 52.8 M, 47.2 F - Mean age 48 yrs) SC Resident (N = 268; 54.9 M, 45.1 F - Mean age 60 yrs) FL Tourist (N = 171; 33.3 M, 66.7 F - Mean age 48 yrs) FL Resident (N = 203; 40.9 M, 59.1 F- Mean age 55 yrs)	This manuscript was prepared as a result of work sponsored by the S.C. Sea Grant Consortium. However, "the statements, findings, conclusions, and recommendations are those of the author(s) and do not necessarily reflect the views of the South Carolina Sea Grant Consortium or NOAA."	Importance-Confidence Analysis (ICA), adapted from Importance-Performance Analysis (IPA), identified attri- butes needing enhanced marketing and consumer education.	268 / 471 people who lived in South Carolina (56.9%) ate seafood and 203 / 4471 people (43.1%) who lived in Florida ate seafood. 273 / 474 (57.6%) tourists in either location ate seafood. Those who lived in South Carolina (compared to visitors), described higher importance for their fish to be sustainable, local, and caught from the wild; and had more confidence in identifying that their fish was…
The role of community-based efforts in promoting sustainable diets: lessons from a grassroots meat-reduction campaign.	https://doi.org/10.5304/jafscd.2021.102.026	Ramsing, R., Chang, K. B., Hendrickson, Z. M., Xu, Z., Friel, M., & Calves, E (2021	2021	United States	Case-study	To explore community-based approaches of reducing meat in the diet to facilitate sustainable eating at individual, household, and community levels.	Baseline: 171 12 Weeks: 145 6 month follow up: 152	Participants were recruited from the town of Bedford. Household were recruited by trained community volunteers to sign Meatless Monday pledges at in-person community forums as well as local businesses.	Initial (Same trend for 12 wks, and 6 mos): Age (Majority 61%): 45-65, Gender: Male 8%, Female 92 %, Ethnicity: Majority (85%) Caucasian, Education Level: Majority (91%) College Degree or Higher.	n/a	Anonymous Quantitative survey at three points (baseline, 12-weeks, 6 month follow up). Data was analyzed for descriptives. Chi-Square tests were run (through Stata 14 software) with an alpha of 0.05 and 0.01 to assess statistical significance of differences among the three groups of respondants.	89 % of participants at baseline said that wanting to eat healthier is a key motivator for dietary habit change. Personal health was the main motivator, across all time points, for meat reduction in the diet. There was a significant decrease from the baseline in the number of respondants who chose health reasons for reducing meat consumtpion, while there was a significant increase in reporting en…	Overall, there was a decrease in meat consumption and an increase in participant awareness of the relation between meat consumption and climate change. This study shows that community-level interventions can successfully contribute to transitions to adoption of more sustainable dietary pattens such as reducing meat consumption.
Parents’ implicit perceptions of dairy milk and plant-based milk alternatives.	https://doi.org/10.3168/jds.2021-21626	Schiano et al., 2022	2022	United States	Cross-sectional	Understand parents' belief systems around fluid dairy milk and plant-based alternatives (PBA) as well as their underlying purchase motivations.	331 (survey and IAT) ... 88 for 1:1 interviews	Participants were recruited from a database of >11,000 US consumers managed by the Sensory Ser vice Center (North Carolina State University, Raleigh).	Gender: 23.9% male, 76.1% female. Majority Caucasian (75.2%). Majority middle age (i.e., 45.6% between 35-44 years, 29.6% between 45-54 years).	Authors declare no COIs but funding provided in part by the Dairy Alliance and the National Dairy Council, although this does not necessarily imply endorsement. However, this study was encouraging the consumption of dairy over PBAs and expressed concern for the dairy industry.	Survey to gather info on demographics alongside an implicit association test to determine attitudes regarding dairy and plant-based alternatives. A subset of participants were selected for follow-up qualitative interviews.	Only a minority of parents are biased in favour of PBA, with the majority either biased towards dairy or taking a neutral stance. Dairy consumption is often a product of familiarity and habit; many participants described strong themes of milk habit and encouragement in childhood. However, only 38% of participants encourage dairy milk consumption for their children. This study highlights how impli…
